# Supplementary material
Source: PubMed Central journal article supplement (PMC4426441)

# Supporting Information

Fiebiger et al. 10.1073/pnas.1505292112

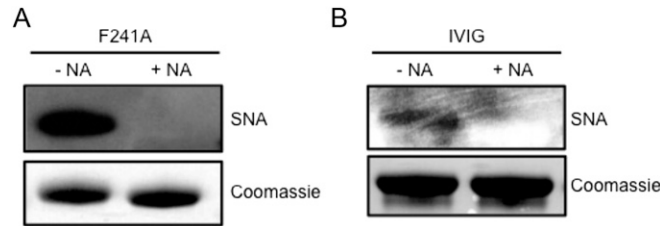

Fig. S1. Verification of sialic acid contents by Sambucus nigra (SNA) lectin blotting. Preparations of F241A (A) and IVIG (B) were detected with SNA by Western blotting to analyze their sialic acid contents. The respective bands in the Coomassie stain served as loading controls.

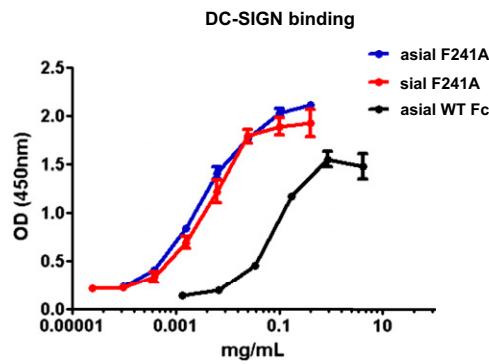

Fig. S2. F241A binds to DC-SIGN independent of sialylation. Recombinant DC-SIGN was immobilized, and binding affinity of asialylated (asial F241A), sialylated F241A (sial F241A), and asialylated wild-type Fc (asial WT Fc) was measured by ELISA. Means  $\pm$  SEM are plotted.

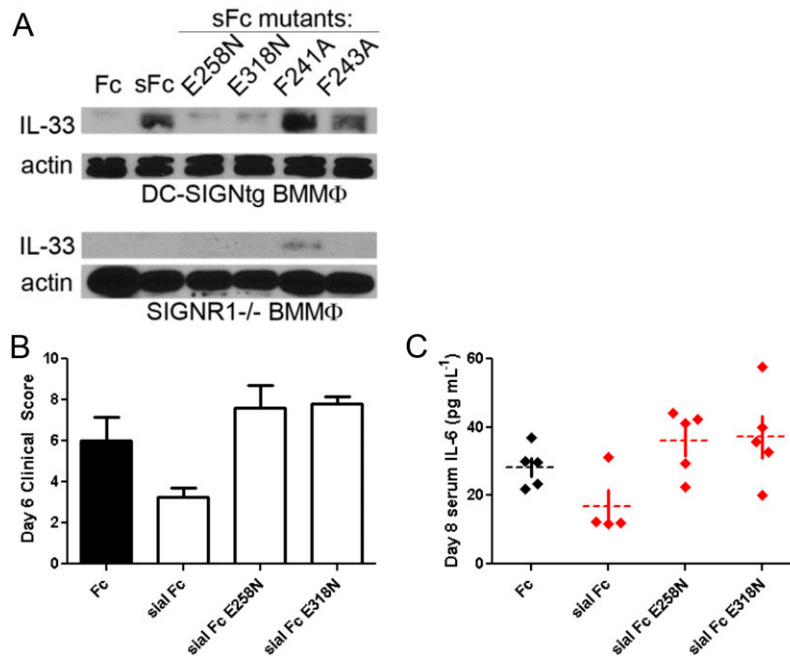

Fig. S3. E318/Lys340 pocket is critical for the antiinflammatory effect of sialylated Fc. (A) Bone marrow cells from SIGNR1<sup>-/-</sup> and hDC-SIGN<sup>+</sup> (DC-SIGN<sup>tg</sup>) mice were isolated and differentiated in vitro into bone marrow-derived macrophages (BMM $\Phi$ s). BMM $\Phi$ s were pulsed with wild-type or mutant Fc. Whole-cell extracts were used for Western blotting. Actin served as loading control. (B) K/BxN-challenged C57BL/6 mice were treated with different Fc preparations. Clinical scores of disease were monitored on day 6 posttreatment. Means  $\pm$  SEM are plotted. (C) Serum IL-6 levels were tested by ELISA 8 d posttreatment.



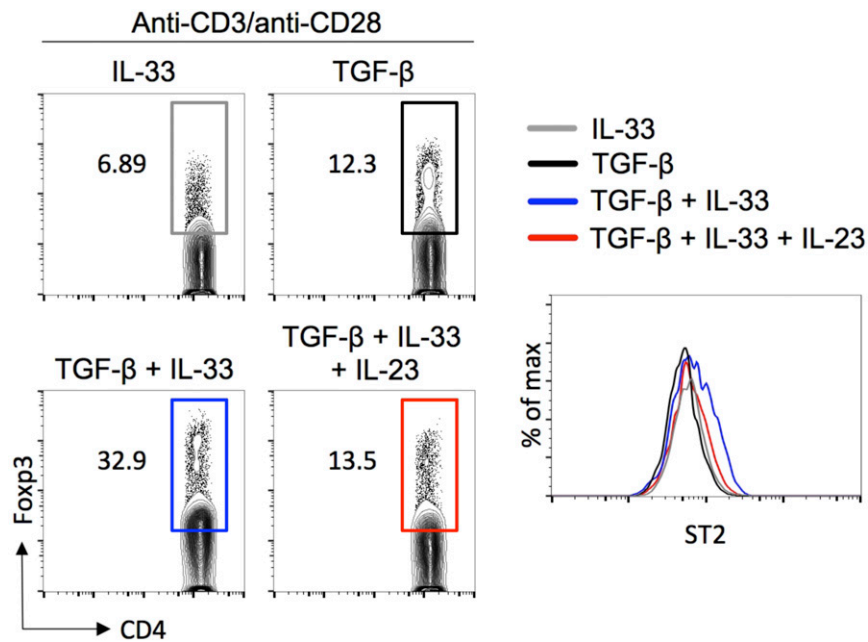

**Fig. 56.** IL-33 synergistically contributes to  $T_{reg}$ -cell differentiation in vitro. Naïve  $CD4^+$  T cells were isolated from spleens of C57BL/6 wild-type mice. Cells were cultured 3 d in the presence of anti-CD3/CD28. To drive  $T_{reg}$ -cell differentiation, TGF- $\beta$  was added to the cells either alone or in combination with IL-33 and IL-23.  $T_{reg}$ -cell numbers and ST2 expression were analyzed by flow cytometry.

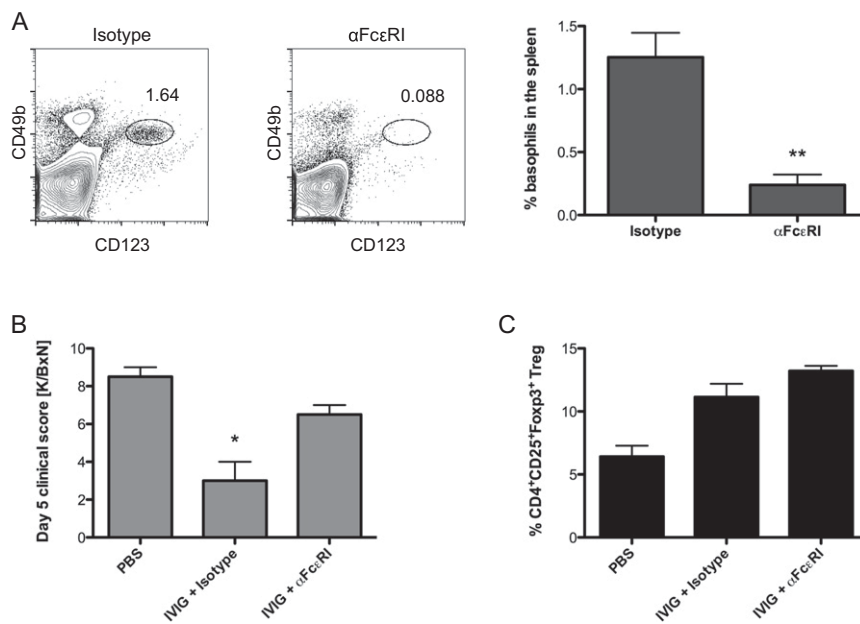

**Fig. 57.** Basophil depletion does not affect IVIG-mediated  $T_{reg}$ -cell stimulation. C57BL/6 wild-type mice were treated with anti-Fc $\epsilon$ RI antibody to deplete basophils or with an isotype control. In addition, mice received IVIG (1 g/kg) or PBS and were challenged with K/BxN sera. (A) FACS analysis of splenic basophils 5 d after injection. (B) Clinical signs of arthritic disease were monitored on day 5 post disease induction. (C) Splenic  $T_{reg}$  cells were analyzed by flow cytometry. Means  $\pm$  SEM are plotted; \* $P$  < 0.05; \*\* $P$  < 0.01 determined by Tukey's post hoc test.

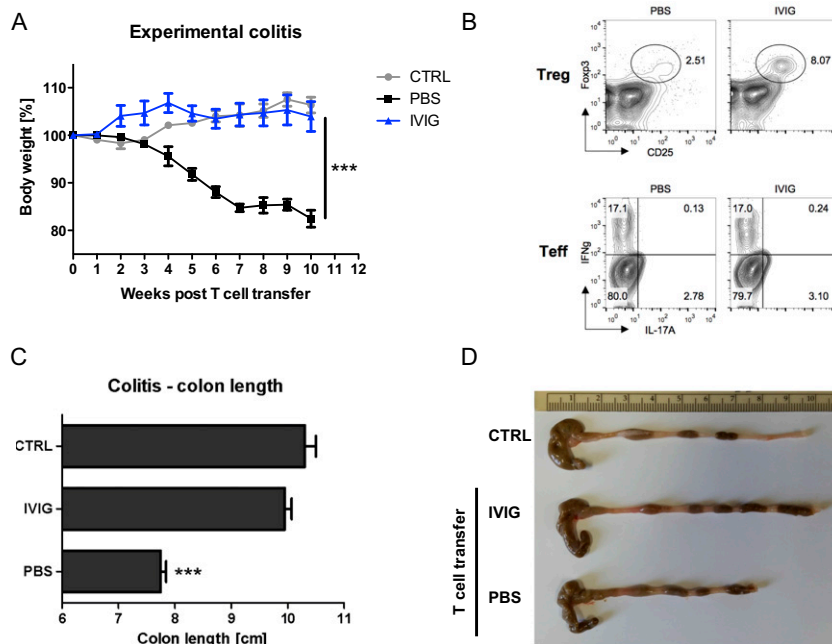

**Fig. 58.** IVIG preferentially activates  $iT_{reg}$  cells and protects from experimental colitis. C57BL/6  $Rag1^{-/-}$  mice were injected with  $CD4^{+}CD45RB^{high}CD25^{-}$  T cells to induce T-cell transfer colitis. Mice were treated once a week with PBS or IVIG (1 g/kg) starting 4 wk post T-cell transfer.  $Rag1^{-/-}$  control mice (CTRL) did not receive any T cells. (A) Body weight was measured once a week. Body weight loss was used as a measure of disease severity. (B) Cells from draining lymph nodes were analyzed for percentages of  $T_{reg}$  cells and  $CD4^{+}$  effector T cells by FACS. (C) Entire colons were dissected and measured. Colon shrinkage reflected disease severity and correlated with body weight loss. (D) Representative image of dissected colons as described in C. Means  $\pm$  SEM are plotted;  $***P < 0.001$  determined by Tukey's post hoc test.

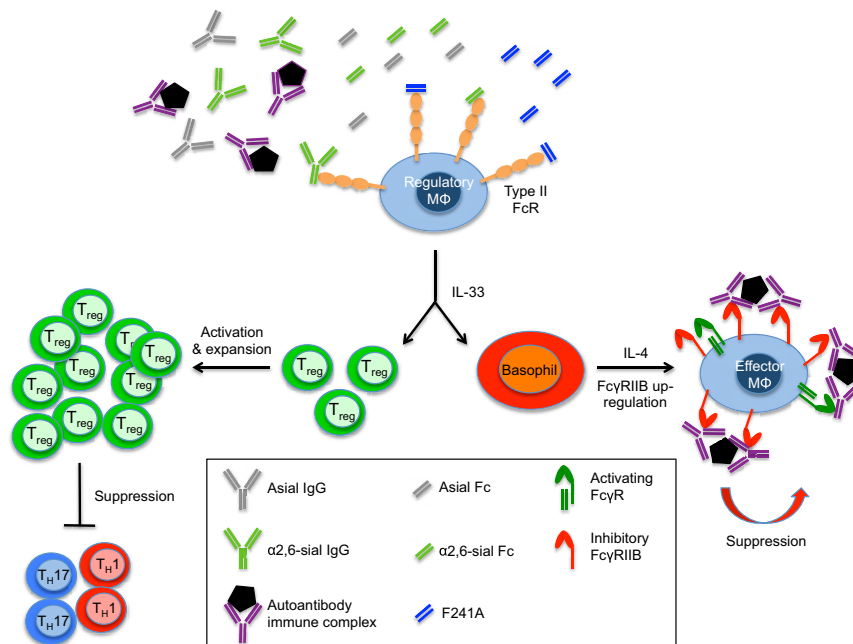

Supplement: pnas.201505292SI.pdf [file pnas.201505292SI.pdf]
